# Supplementary material
Source: Springer Nature journal article supplement (https://www.springermedizin.de/resource/supplementary/12879_2010_1425_MOESM1_ESM.pdf/9443224)
Supplement: MOESM1 [file 9443224]

**All admissions with varicella  
in the Netherlands, 2003-2006**  
N=1,658

**Admissions in 23  
participating hospitals**  
N=359

**Admissions in  
other hospitals**  
N=1,299

**Included  
admissions\***  
N=301 (83.8%)

**Excluded  
admissions**  
N=58 (16.2%)

**No permission  
patient**  
N=26 (7.2%)

**Patient  
deceased\*\***  
N=8 (2.2%)

**Patient  
moved\*\***  
N=5 (1.4%)

**Not enough data to trace  
MR/MR not available**  
N=13 (3.6%)

**No mention  
varicella in MR\*\*\***  
N=6 (1.7%)
